# Supplementary material for: National and sub-national variation in patterns of febrile case management in sub-Saharan Africa
Source: PubMed Central journal article supplement (PMC6255762; doi:10.1038/s41467-018-07536-9), 2018-11-26
Supplement: 41467_2018_7536_MOESM2_ESM.pdf [file 41467_2018_7536_MOESM2_ESM.pdf]

## Description of Additional Supplementary Files

**File Name:** Supplementary Data 1

**Description:** Summary of assembled nationally representative survey data. All household survey data used in the study were obtained from DHS program (<https://dhsprogram.com/data/>), obtained via online application and registration.

**File Name:** Supplementary Data 2

**Description:** Country level modelled estimates of probability of treatment at population level (Posterior median and the 95% Bayesian credible interval) by travel time and by facility type.

**File Name:** Supplementary Software 1

**Description:** A generalised R statistical software computer code for Bayesian three parameter estimation in IRT with implementation is conducted via MCMC (R-JAGS). Also includes code for reproducing IRT curves (Figure 3A and graphs in Supplementary Figure 1).
